# Supplementary material
Source: MDPI journal article supplement (https://www.mdpi.com/2227-9717/9/2/217)
Supplement: s1 [file s1]

# Preparation and Characterization of Sulphur-impregnated Natural Zeolite Clinoptilolite for Hg(II) Removal from Aqueous Solutions

Marin Ugrina <sup>1,\*</sup>, Martin Gaberšek <sup>2</sup>, Aleksandra Daković <sup>3</sup> and Ivona Nuić <sup>1</sup>

<sup>1</sup> Department of Environmental Engineering, Faculty of Chemistry and Technology, University of Split, Ruđera Boškovića 35, 21 000 Split, Croatia; mugrin@ktf-split.hr (M.U.); ivona@ktf-split.hr (I.N.)

<sup>2</sup> Department of Mineral Resources and Geochemistry, Geological Survey of Slovenia, Dimičeva Ulica 14, 1000 Ljubljana, Slovenia; martin.gabersek@geo-zs.si

<sup>3</sup> Institute for Technology of Nuclear and Other Mineral Raw Materials, P. O. Box 390, 11 000 Belgrade, Serbia, a.dakovic@itnms.ac.rs

\* Correspondence: mugrin@ktf-split.hr; Tel.: +385-21-329-454

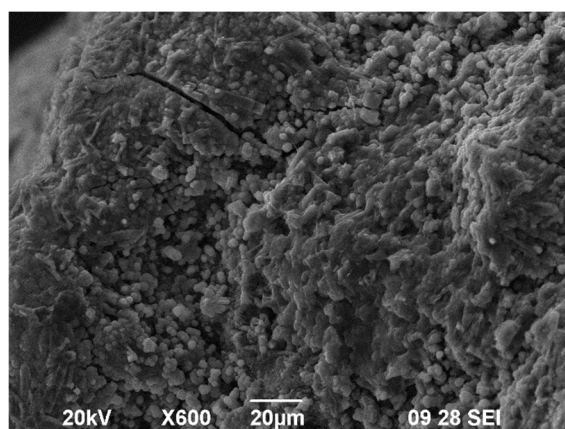

**Figure S1.** SEM secondary electron image of SZ at magnification of 600 ×.

Distribution of Hg(II) species as a function of pH is calculated on the basis of the constants presented in Equations (1) - (3) [1] and illustrated in Figure S2.

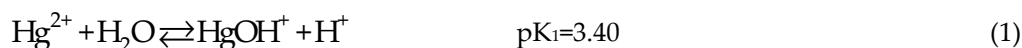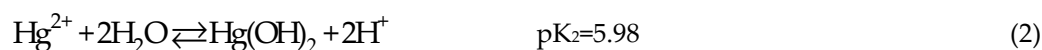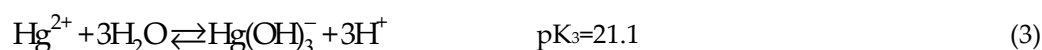

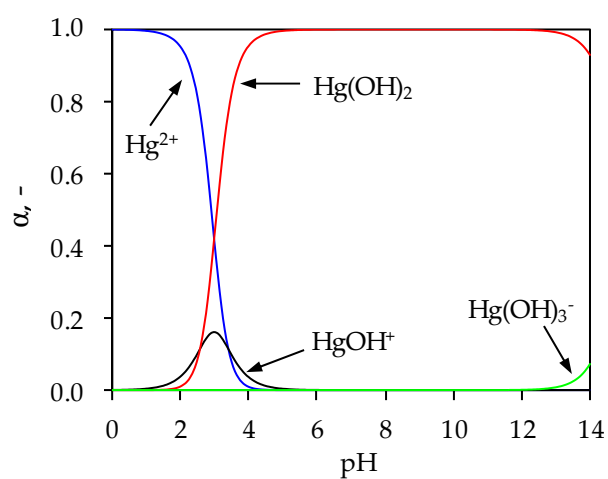

**Figure S2.** Distribution of Hg(II) species as a function of pH.

22

## References

23

1. Nazarenko, V.A.; Antonovich, V.P.; Nevskaja, E.M. *Metal ions hydrolysis in dilute solutions*, Atomizdat, Moscow, 1979, pp. 34-47.

24
